# Supplementary material
Source: publisher figshare collection journal article supplement (https://geolsoc.figshare.com/ndownloader/files/25790597)
Supplement: Supplementary file 1 [file 25790597]

## Sheet: Sheet2
Supplementary Table 1. Suspect eruptive events of Tianchi volcano
Record No.	Classification code	Phenomenon	c.a.(solar calendar)	Lunar calendar (in Chinese)	Description (trans. English)	Localtion	Records (in Chinese)	Period (in Enbglish)	Period (in Chinese)	Previous mentioned in references	Source
1		sound	24 January 939		The sound of a large drum was heard.			the 1st King of the Goryeo Dynasty (918-943)	太祖(918-943)	Yun et al. (2014)	Nihonki–ryaku
2	3.5.1a		3 November 946	(天慶九年)十月七日	the roll of drums from sky	Kaesong/Nara	是嵗天鼓鳴赦/(天慶九年)十月七日夜白灰散如雪	the 3rd King of the Goryeo Dynasty (945-949)	定宗(945-949)	Hayakawa & Koyama (1998); Yun et al. (2014); Pan et al. (2020)	Koryŏsa; Kohfukuji chronicle
3	3.5.1b		7 February 947	(天暦元年正月)十四日	sound in the sky, like thunder	Kyoto	空中有聲如雷鳴/正月十四日庚子，次日空中有声，如雷	the 3rd King of the Goryeo Dynasty (945-949)		Hayakawa & Koyama (1998); Yun et al. (2014); Pan et al. (2020)	Teishin-kō ki/Nihonki–ryaku
4	3.5.2a	white/red smoke	6 April and 16 May 1014	1014年3月5日; 1014年3月16日	One night … all over the place was tinged with red	Kaesong (unspecified)	穆宗十二年二月巳丑日色如張紅幕; 顯宗元年十一月戊戌日晕如虹旁有珥色青赤	the 5th year of King Hyeonjong of the Goryeo Dynasty	显宗(1009-1031)	Yun et al. (2014)	Koryŏsa/Dongguk Munheon Bigo
5	3.5.2b		27 January 1017	1016年12月27日	All over the place was shrouded in a red tinge.	Kaesong (unspecified)	显宗…七年十二月丁酉四方赤祲	the 7th year of King Hyeonjong of the Goryeo Dynasty		Yun et al. (2014)	Koryŏsa/Dongguk Munheon Bigo
6	3.5.2c		4 Marhc and 15 December, 1017	1017年3月4日，12月15日(date?)	The whole sky was tinged with red like fire	Kaesong (unspecified)	显宗...八年三月丙午白氣貫日; 八年十一月巳未夜白氣如練竟天俄變為赤祲	the 8th year of King Hyeonjong of the Goryeo Dynasty		Yun et al. (2014)	Koryŏsa/Dongguk Munheon Bigo
7	3.5.2d		17 February 1018	1018年1月29日	A white-banded smoke reached the sky	Kaesong (unspecified)	九年正月癸亥白氣如带亘天	the 9th year of King Hyeonjong of the Goryeo Dynasty		Yun et al. (2014)	Koryŏsa/Dongguk Munheon Bigo
8	3.5.2e		6 March 1019	1019年1月27日	red sky	Kaesong (unspecified)	十年	the 10th year of King Hyeonjong of the Goryeo Dynasty		Yun et al. (2014)	Koryŏsa/Dongguk Munheon Bigo
9	3.5.3a	rain earth	11 April 1018; 24 May 1018	1018年4月3日:?	two events of rain earth	Kaesong (unspecified)	显宗九年二月癸未雨土。 四月丙寅雨土。	the 9th year of King Hyeonjong of the Goryeo Dynasty		Jin & Cui (1998); Yun et al. (2014)	Koryŏsa vol. 2
10	3.5.3b		not obtained	1036年3月18日; 1040年2月9日; 1041年2月24日	four events of rain earth	Kaesong (unspecified)	靖宗二年三月丙戌雨土丁酉亦如之。 六年二月甲午雨土。 七年二月癸卯雨土色黄	the 2nd, 6th, 7th years of King Jeongjing of the Goryeo Dynasty	靖宗(1034-1046)		Koryŏsa vol. 2
11	3.5.3c		not obtained	1091年4月12日	rain earth and last for three days	Kaesong (unspecified)	宣宗八年四月辛丑雨土三日	the 8th year of King Seonjong of the Goryeo Dynasty	宣宗(1083-1094)		Koryŏsa vol. 2
12	3.5.3d		not obtained	1119年1月22日	snow and rain earth	Kaesong (unspecified)	睿宗…十四年正月己巳雨雪交下或雨土	the 14th year of King Yejong of the Goryeo Dynasty	睿宗(1105-1122)		Koryŏsa vol. 2
13	3.5.3e		not obtained	1119年3月9日	rain earth	Kaesong (unspecified)	睿宗十四年三月乙卯雨土	the 14th year of King Yejong of the Goryeo Dynasty			Koryŏsa vol. 2
14	3.5.3f		25 March 1124	1124年3月8日;10月29日;10月30日;1137年2月3日;1138年2月4日; 1138年10月25日; 1139年2月16日; 1140年2月不详; 1142年1月不详; 1142年12月9日; 1143年12月3日	tweleve events of rain earth	Kaesong (unspecified)	仁宗二年三月丙辰雨土三日。 九年十月壬辰雨土大风雨雹癸巳雨土。 十一月甲午雨土乙未亦如之。 十五年二月乙未雨土数日。 十六年二月庚申雨土。 十月戊寅雨土。 十七年二月丁卯雨土。 十八年二月戊子雨土大雾二十年正月甲申雨土。 十二月丁卯雨土。 二十一年十二月乙酉雨土	the 2nd, 9th, 15th, 15th, 17th, 18th, 20th, 21th years of King Injong of the Goryeo Dynasty	仁宗(1122-1146)	Yun et al. (2014)	Koryŏsa vol. 2
15	3.5.3g		not obtained	1140年3月22日	snow and rain earth	Kaesong (unspecified)	仁宗...十八年三月甲申大雪丁亥大雪雨土	the 18th year of King Injong of the Goryeo Dynasty			Koryŏsa vol. 2
16	3.5.3h		not obtained	1142年1月不详	rain earth	Kaesong (unspecified)	仁宗...二十年正月乙未朔大风终日飞沙走石丁巳大风飞沙癸未大风雨土	the 20th year of King Injong of the Goryeo Dynasty			Koryŏsa vol. 2
17	3.5.3i		14 May 1124;	1148年3月9日; 1152年3月17日; 1155年1月8日	four events of rain earth	Kaesong (unspecified)	毅宗二年三月丁卯雨土。 六年三月壬子雨土。 九年正月丙辰雨土戊辰亦如之。	the 2nd, 6th, 9th years of King Uijong of the Goryeo Dynasty	毅宗(1146-1170)	Jin & Cui (1998)	Koryŏsa vol. 2
18	3.5.3j		not obtained	1186年1月23日; 1187年2月15日; 1190年2月7日; 1193年10月19日	four events of rain earth	Kaesong (unspecified)	明宗十六年正月壬寅雨土。 十七年二月丁亥雨土。 十八年二月癸酉雨土。 二十三年十月壬子雨土。	the 16th, 17th, 18th and 23th years of King Wonjong of the Goryeo Dynasty	明宗(1170-1197)		Koryŏsa vol. 2
19	3.5.3k		not obtained	1195年11月8日	rain earth and thunder	Kaesong (unspecified)	明宗...二十五年十一月己丑雨土而雷	the 25th year of King Wonjong of the Goryeo Dynasty			Koryŏsa vol. 2
20	3.5.3l		not obtained	1198年2月17日	rain earth	Kaesong (unspecified)	神宗元年二月乙酉雨土	the 1st year of King Shinjong of the Goryeo Dynasty	神宗(1197-1204)	Jin & Cui (1998)	Koryŏsa vol. 2
21	3.5.4	boiliing water in well	June 1199	1200年5月	In the South, the water in the well was turned red and made the sound of boiling like a lowing cry for ten days.	South (of Kaesong)(unspecified)	神宗二年五月南部北井水赤沸声如牛鸣翻十余日	the 2nd year of King Shinjong of the Goryeo Dynasty		Cui et al. (2008)； Yun et al. (2014)	Koryŏsa/Haedongjapgi
22	3.5.2f	black smoke	23 october, 1199	1200年10月23日;1200年闰2月22日; 1201年4月1日	The thunder…filled the air and the blackish-red gas arose in Gog-nyeong(鵠嶺). It continued to fill the air and filled the capital with hail falling down. It was getting dark, so no one even an inch ahead was to be seen	Kaesong (鹄岭,a hill near Kaesong)	神宗二年十月辛酉雷俄而有怪气中黑边赤从鹄岭出渐大弥満京都遂雨雹黑气下地咫尺不见人	the 2nd year of King Shinjong of the Goryeo Dynasty		Cui et al. (2008)； Yun et al. (2014)	Koryŏsa/Haedongjapgi/Dongguk Munheon Bigo
23	3.5.3m	rain earth	4 May 1201	1201年4月1日	two events of rain earth	Kaesong (unspecified)	神宗三年闰二月戊申四方昏蒙雨土二日, 庚午雨土四方昏蒙竟日	the 3th year of King Shinjong of the Goryeo Dynasty		Jin & Cui (1998)	Dongguk Munheon Bigo
24	3.5.3n		not obtained	1224年2月5日; 1224年9月20日; 1224年9月29日; 1226年3月21日; 1256年4月3日; 1258年2月6日; 1258年2月11日	seven events of rain earth	Kaesong (unspecified)	高宗十一年二月壬申雨土。 九月癸未雨土壬辰亦如之。 十三年三月丙子雨土。 四十三年四月甲子雨土。 四十五年二月丙戌雨土辛卯亦如之	the 11th, 13th, 43th and 45th years of King Gojong of the Goryeo Dynasty	高宗(1213-1259)		Koryŏsa vol. 2
25	3.5.3o		not obtained	1260年1月12日; 1260年1月26日; 1260年9月28日	three events of rain earth	Kaesong (unspecified)	元宗元年正月庚辰雨土甲午雨土日昏无光。 九月癸巳雨土。	the 1st year of King Wonjong of the Goryeo Dynasty	元宗(1259-1274)		Koryŏsa vol. 2
26	3.5.5a	rain white powder/hair	15 Apri 1265	1265年3月18日	rain like white powder	Kaesong (unspecified)	元宗... 六年三月丁亥微雨白如 粉。	the 6th year of King Wonjong of the Goryeo Dynasty		Jin & Cui (1998)	Koryŏsa vol. 2
27	3.5.3p	rain earth	not obtained	1306年2月30日	rain earth	Kaesong (unspecified)	忠烈王三十二年二月庚午雨土。	the 32th year of King Chungnyeol of the Goryeo Dynasty	忠烈王(1274-1308）		Koryŏsa vol. 2
28	3.5.3q		not obtained	1311年2月不详	rain earth	Kaesong (unspecified)	忠宣王三年二月乙亥雨土	the 3rd year of King Chungseon of the Goryeo Dynasty	忠宣王(1298,1308-1313)		Koryŏsa vol. 2
29	3.5.3r		not obtained	1328年11月	rain earth	Kaesong (unspecified)	忠肃王...十五年十一月甲申大风雨土	the 15th year of King Chungsuk of the Goryeo Dynasty	忠肃王(1332-1339)		Koryŏsa vol. 2
30	3.5.3s		not obtained	1373年4月26日	rain earth	Kaesong (unspecified)	恭愍王二十二年四月丁酉雨土	the 22th year of King Gongming of the Goryeo Dynasty	恭愍王(1351-1374)	Jin & Cui (1998); Yun et al. (2014)	Koryŏsa vol. 2
31	3.5.5b	rain white hair	30 April 1373; 18 and 23 May 1373;	1373年4月7日; 4月11日, 12 日, 16日, 25日	see the text	Kaesong (unspecified)	恭愍王... 四月丁丑夜天雨白毛长二寸或三四寸细如马 。 戊寅夜雨白毛壬午癸未丁亥丙申亦如之。	the 22th year of King Gongming of the Goryeo Dynasty		Jin & Cui (1998); Yun et al. (2014)	Koryŏsa vol. 2
32	3.5.5c		27 June 1373; 2, 3, 7, 16 July 1373	1373年6月8日, 12日, 13日, 17日, 26日	see the text	Kaesong	恭愍王...二十二年四月己卯大雾雨白毛遍国中庶人皆曰龙毛拾而视之乃白马 也。 五月壬寅朔雾雨毛。	the 22th year of King Gongming of the Goryeo Dynasty		Jin & Cui (1998)	Koryŏsa vol. 2
33	3.5.6	rain charcoal	8 May, 1401	1401年闰三月二十五日	Dim sky, rain charcoal	Tanchon/Dan-cheon	本朝太宗元年端川雨炭	the 1st year of the King Taejong of Joseon dynasty	太宗(1401-1418)	Jin & Cui (1998); Yun et al. (2014)	Dongguk Munheon Bigo
34					Dim sky, rain charcoal	Tanchon/Dan-cheon	朝鲜太宗一年(辛巳)闰三月二十五日(甲寅)雨炭于端州. 東北面察理使報: 端州東北間，非烟非霧，渾天黑暗，有炭落地. 封數枚以上	the 1st year of King Taejong of Joseon dynasty		Yun et al. (2014); Li (2017)	Taejong Wangjo sillok
35	3.5.7a	rai ash	18 Feb, 1403	1403年1月27日,	Ash like medium-burned wormwood fall dwon and accumulated with thickness of 3 cm. Ashes disapeared five day later.	Kansan (Gap-ju)	朝鲜太宗三年(癸未)正月二十七日(乙巳)(1403 年 2 月 18 日)甲州地寧怪、伊羅等處，雨半燒蒿灰，厚一寸，五日而消。	the 3rd year of King Taejong of Joseon dynasty		Yun et al. (2014); Li (2017)	Dongguk Munheon Bigo
36	3.5.7b		13 Apr, 1403		Ash rain to the northeast	Northeast (Northeastern Myeon)	朝鲜太宗三年(癸未)三月己亥(三月二十二日)(公元 1403 年 4 月 13 日) 东北面雨灰	the 3rd year of King Taejong of Joseon dynasty		Yun et al. (2014); Li (2017)	Dongguk Munheon Bigo
37	3.5.7c		23 Mar, 1405		rain with colour of gray	Seoul	太宗五年(乙酉)二月二十三日(己丑)(1405 年 3 月 23 日)雨色如灰	the 5th year of King Taejong of Joseon dynasty		Yun et al. (2014); Li (2017)	Dongguk Munheon Bigo
38	3.5.3t	rain earth	27 Februry, 1406		The ash rain blew in Dan-ju, Dongbuk-myeon for 14 days(The volcanic activities lasted for two weeks)	Tanchon (Northeastern Myeon)	太宗六年二月庚午東北面端州雨土凡十四日	the 6th year of King Taejong of the Joseon Dynasty		Yun et al. (2014)	Dongguk Munheon Bigo
39	3.5.8	rain seed?	1553		see the text	Daegu	庚子慶尚道觀察使丁應斗狀啟二月初八日道内五十馀邑地震或屋宇墙壁墜落或山城崩壞自地震後有大風又有非烟非霧散布空中不辨山野天日黯黮或有怪異之物自空散落有如葱種有如雞冠花實有三觚如蕎麥子皆内白外黑至三月初六日而止全羅道觀察使曹光逺狀啟二月初八日順天等十馀邑地震傅于政院曰近来衆災俱發不知何以有此歟且慶尚道来如葱種之物令内農圃種之
40	3.5.4u	rain earth	4 March 1573		The ash rain blew in Hamgyeong Province	Seoul	李朝宣祖六年二月雨土	the 6th year of King Seonjo of the Joseon Dynasty	宣祖(1567-1608)	Jin & Cui (1998); Yun et al. (2014)	Dongguk Munheon Bigo
41	3.5.9	debris flow	10 December, 1597		earthquake and collapse	Samsu	咸鏡道觀察使宋言慎書狀去八月二十六日辰時三水郡境地震暫時而止二十七日未時又為地震城子二䖏颓圯而越邊甑巖半片崩颓同巖底三水洞中川水色變為白二十八日更變為黄仁遮外堡东距五里許赤色土水湧出數日乃止八月二十六日辰時小農堡越邊北德者耳遷絶壁人不接足䖏再度有放砲之聲仰見則烟氣漲天大如數抱之石隨烟拆出飛过大山後不知去䖏二十七日酉時地震同絶壁更為拆落同日亥時子時地震事	the 30th year of King Seonjo of the Joseon Dynasty		Li (2017); Yun et al. (2014)	Joseon Wangjo sillok
42	3.5.10a	rain ash and integrated record	29 November, 1654		Throughout Haymgeong Province, Jeok-seong and Jang-dan(near Seoul), the air was tinged with black, it rained, smoke rose and the fishy smell filled the air in the valley, it became dark and nothing an inch ahead could be distinguished	Haymgeong Province, Jeok-seong and Jang-dan(near Seoul)	前判書趙絅上疏，其略曰: 今年都城之水、三角之頹、江海之赤，一何沓出於聖明之時也?豈禍亂伏於冥冥之中，人不覺之而天乃啓告而警之耶? 然諸災非老臣所目見者，至於黑氣，則臣所目見也。其氣若雨非雨，若烟非烟，自北而來，聲若風驅，臭若腥臊，轉頭之頃，彌滿山谷，掩翳三光，咫尺不辨牛馬，吁亦異哉! 近則積城 * 、長湍 * 之間，遠則咸鏡南道之界，無處不然云。臣雖素昧甘石之學，以常情、肉眼度之，此必氣祲之類也	the 5th year of King Hyojong of the Joseon Dynasty	孝宗(1649-1659)	Li (2017); Yun et al. (2014)	Joseon Wangjo sillok
43	3.5.10b	rain ash and integrated record	12 June 1668 or 2 June 1668		rain ash	Kyongsong and Puryong	显宗九年四月，咸镜道镜城府雨灰，富宁同日雨灰	the 9th year of King Hyeonjong of the Joseon Dynasty	肃宗(1674-1720)	Jin & Cui (1998); Yun et al. (2014)	Joseon Wangjo sillok
44		rain ash and integrated record	12 June 1668		description of rain ash		上謂大臣曰咸鏡道雨灰之變甚可愕也朴承後疏中有云周天二十餘處坼裂左相在郷時闻之否許積對曰有是言也东方天坼光同火鏡且有赤馬相闘之状傳説者甚多次日北方有赤氣又次日有白氣之異天開太平之象天坼亂之兆	the 9th year of King Hyeonjong of the Joseon Dynasty		this study	Joseon Wangjo sillok
45	3.5.7d	rain ash	4 July, 1673	1673年5月20日		Myongchon (Myeongcheon)	明川等地雨灰道臣以聞	the 14th year of King Hyeonjong of the Joseon Dynasty		Yun et al. (2014)	Joseon Wangjo sillok
46	3.5.10c	rain ash and integrated record	9 June 1702		see the text	Kyongsong and Puryong	咸鏡道富寕府本月十四日午時天地忽然晦暝時或黄赤有同烟熖腥臭満室若在洪爐中人不堪熏热四更後消止而至朝視之则遍野雨灰恰似焚蛤殼者然鏡城府同月同日稍晚後烟霧之氣忽自西北天昏地暗腥膻之臭襲人衣裾熏染之氣如在洪爐人皆去衣汗流成槳飛灰散落如雪至於寸許收而視之則皆是木皮之馀燼江邊諸邑亦皆如是或有特甚處	the 28th year of King Sukjong of the Joseon Dynasty		Jin & Cui (1998); Yun et al. (2014)
47	3.5.11a		1898		A Russian explorer reached the summit of Mt. Baekdu and wrote his field trip logs that described the occurrence of an eruption from the caldera of the volcano.					Yun et al. (2014)
48	3.5.12	integrated record	1903		see the text/	Tianchi lake				Jin & Cui (1998); Yun et al. (2014)
49	3.5.11b		1925		The existence of the record in the book written by the Far East branch of the former Soviet Union Academy of Sciences in 1984.					Yun et al. (2014)
Notes:
	time of Koryŏsa were checked at http://db.history.go.kr/，those from Joseon Wangjo sillok were cheked at http://sinocal.sinica.edu.tw/ (which is now invalid)
	not obtained: The dates of solar calendar were selected from references. However, some of the were not obtained by simply counting the day, because the calender in Goryeosa dynasty changed frequently.
References:
	Yun, S, Cho, E, Yang, I. 2014. ‘Interpretation of Historical Eruptions of Mt. Baekdu Volcano, Korea. AGU Conference paper, San Francisco, V31C-4766.
	Hayakawa, Y. & Koyama M. 1998. Dates of two major eruptions from Towada and Baitoushan in the 10th century. Volcnao, 43(5), 403–407. (in Japanese with English abstract)
	Jin, D., & Cui, Z. 1999. A study of volcanic eruptions in Tianchi volcano, Changbaishan mountains recorded in historical documents. Geological Review. 45, 304–307. (in Chinese with English abstract)
	Li, Y. 2017. The historical records of volcanic eruption in the Korean peninsula. Seismology and Geology. 39(5):1079–1089. doi:10.3969/j.issn.0253－4967.2017.05.015 (in Chinese with Englishe abstract)
	Pan, Bo., de Silva S.L., Xu J., Liu S., Xu D., 2020. Late Pleistocene to present day eruptive history of the Changbaishan-Tianchi Volcano, China/DPRK: New field, geochronological and chemical constraints. J. Volcanol. Geotherm. Res. 399:1-18. https://doi.org/10.1016/j.jvolgeores.2020.106870
